# Supplementary material for: Regulation of iron transport related genes by boron in the marine bacterium Marinobacter algicola DG893
Source: Royal Society of Chemistry journal article supplement (doi:10.1039/c3mt00068k), 2013-01-01
Supplement: c3mt00068k.pdf [file c3mt00068k.pdf]

## Supplementary Material

for

# Regulation of Iron Transport Related Genes by Boron in the Marine Bacterium *Marinobacter algicola* DG893

Ariel Romano, Lyndsay Trimble, Ashtian R. Hobusch, Kristine J. Schroeder, Shady A. Amin<sup>§</sup>, Andrej  
D. Hartnett, Ryan A. Barker, Alvin L. Crumbliss<sup>†</sup> and Carl J. Carrano\*

Department of Chemistry and Biochemistry

San Diego State University

San Diego, CA 92162-1030

and

<sup>†</sup>Department of Chemistry

Duke University

Durham, NC 27708-0346

**Table S1. List of primers used in qPCR to quantify gene transcripts of important iron uptake genes.**

| Target Gene | Primer Sequences                               | Putative Function                                     | Accession No. |
|-------------|------------------------------------------------|-------------------------------------------------------|---------------|
| <i>pvsA</i> | TGTGATCAGTTCTGGCAAGG<br>CCAATGGTCTCCAGAGTGTG   | Vibrio ferrin biosynthesis gene                       | ZP_01892156   |
| <i>fbpA</i> | TCGCTCACCATGGCGAAGAAGC<br>AATGTCGCACTCGCCGGCAT | Periplasmic iron binding protein                      | ZP_01892821   |
| <i>pvuA</i> | GGTTCTGGCCGAAGAAGAAGG<br>ACGAAGCGGACATGAGTCG   | VF outer membrane receptor                            | ZP_01892151   |
| <i>fhuA</i> | TGGACCGTCGTGCCATTGCC<br>CGGGCTTTCTGCAAGGCGGA   | Ferric hydroxamate uptake<br>protein                  | ZP_01893439   |
| <i>vciA</i> | CTGAACCTACCGCCCTGTATCC<br>CGATTGGTGTCTCGATCTCC | TonB-dependent outer membrane<br>siderophore receptor | ZP_01893080   |
| <i>gyrA</i> | GTGCATCGCCGCGTACTGTT<br>ATAACGCATGGCAGCCGCGT   | DNA gyrase subunit A                                  | ZP_01895129   |
| <i>rpoD</i> | GGACAGGTGTTTGGCGCCGTT<br>TGC GCGGCATCTTGACTCA  | RNA polymerase                                        | ZP_01893908   |

Table S2. MALDI-TOF Identification of Proteins and Mascot Scores for Highly Boron Regulated Proteins

| Spot number | MALDI well number | Match Quality | NCBI                                                                                                          |               |            |            |           |               |                       |                 | comments |                   |
|-------------|-------------------|---------------|---------------------------------------------------------------------------------------------------------------|---------------|------------|------------|-----------|---------------|-----------------------|-----------------|----------|-------------------|
|             |                   |               | Top Ranked Protein Name(Species)                                                                              | Accession No. | Protein MW | Protein PI | Pep.Count | Protein Score | Protein Score C. I. % | Total Ion Score |          | Total Ion C. I. % |
| 38          | A11               |               | flagellin domain protein [Marinobacter algicola DG893]                                                        | gi 149376772  | 49717.9    | 4.13       | 14        | 764           | 100                   | 588             | 100      |                   |
| 39          | A12               |               | Extracellular ligand-binding receptor [Marinobacter algicola DG893]                                           | gi 149375741  | 39398.4    | 4.32       | 11        | 354           | 100                   | 198             | 100      |                   |
| 48          | A13               |               | TRAP dicarboxylate transporter, DctP subunit [Marinobacter algicola DG893]                                    | gi 149375450  | 38562.8    | 4.37       | 8         | 524           | 100                   | 426             | 100      |                   |
| 51          | A14               |               | ABC-type Fe3+ transport system, periplasmic component [Marinobacter algicola DG893]                           | gi 149375048  | 37589.7    | 4.79       | 13        | 475           | 100                   | 296             | 100      |                   |
| 52          | A15               |               | ABC-type Fe3+ transport system, periplasmic component [Marinobacter algicola DG893]                           | gi 149375048  | 37589.7    | 4.79       | 11        | 382           | 100                   | 240             | 100      |                   |
| 53          | A16               |               | ABC-type amino acid transport/signal transduction system, periplasmic component [Marinobacter algicola DG893] | gi 149376724  | 36497.2    | 4.76       | 16        | 564           | 100                   | 322             | 100      |                   |
| 62          | A17               |               | probable oxidoreductase [Marinobacter algicola DG893]                                                         | gi 149375909  | 30724      | 5.2        | 4         | 214           | 100                   | 176             | 100      |                   |
| 66          | A18               |               | immunogenic protein [Marinobacter algicola DG893]                                                             | gi 149374491  | 34910.3    | 5.11       | 14        | 591           | 100                   | 415             | 100      | see detail hit#2  |
| 68          | A19               |               | extracellular solute-binding protein, family 3 [Marinobacter algicola DG893]                                  | gi 149376080  | 27876.5    | 4.34       | 5         | 220           | 100                   | 163             | 100      |                   |
| 69          | A20               |               | extracellular solute-binding protein, family 3 [Marinobacter algicola DG893]                                  | gi 149375977  | 27565.5    | 4.29       | 4         | 240           | 100                   | 196             | 100      |                   |

|                 |
|-----------------|
| high confidence |
| low confidence  |
| no confidence   |

Table S3. Maldi-TOF Identification of Proteins and Mascot Scores for Highly Iron Regulated Proteins

| Spot number | MALDI well number | Match Quality / Species | NCBI                                                              |               |            |            |           |               |                       |                 |                   |
|-------------|-------------------|-------------------------|-------------------------------------------------------------------|---------------|------------|------------|-----------|---------------|-----------------------|-----------------|-------------------|
|             |                   |                         | Top Ranked Protein Name(Species)                                  | Accession No. | Protein MW | Protein PI | Pep.Count | Protein Score | Protein Score C. I. % | Total Ion Score | Total Ion C. I. % |
| 11          | E6                |                         | hypothetical protein MDG893_17602 [Marinobacter algicola DG893]   | gi 149377570  | 76214.5    | 4.46       | 24        | 415           | 100                   | 180             | 100               |
| 13          | E7                |                         | TonB-dependent siderophore receptor [Marinobacter algicola DG893] | gi 149375670  | 77163      | 4.64       | 33        | 538           | 100                   | 240             | 100               |
| 14          | E8                |                         | hypothetical protein MDG893_17602 [Marinobacter algicola DG893]   | gi 149377570  | 76214.5    | 4.46       | 33        | 517           | 100                   | 145             | 100               |
| 79          | E9                |                         | ferredoxin--NADP+ reductase [Marinobacter algicola DG893]         | gi 149376730  | 29200.6    | 5.1        | 15        | 467           | 100                   | 295             | 100               |
| 82          | E10               |                         | 2-dehydro-3-deoxyglucarate aldolase [Marinobacter algicola DG893] | gi 149374383  | 24935.5    | 5.12       | 9         | 422           | 100                   | 334             | 100               |

|                 |
|-----------------|
| high confidence |
| low confidence  |
| no confidence   |

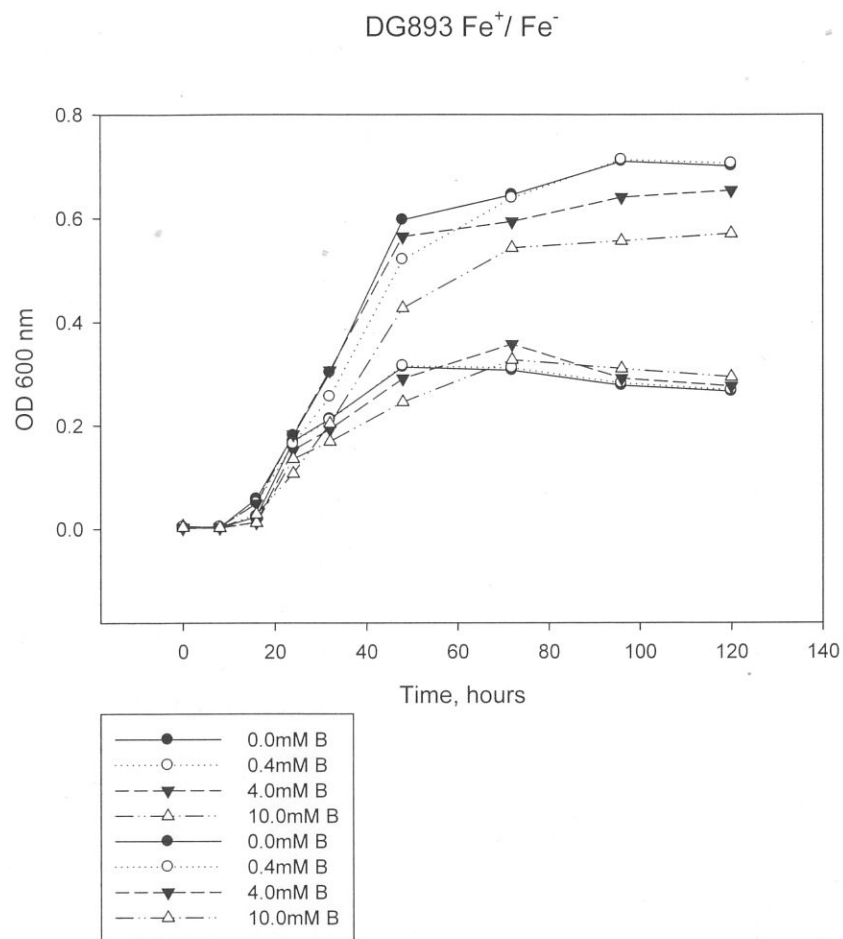

Figure S4. Growth curves for DG893 under various boron and iron concentrations as described in the Materials and Methods. The upper four curves represent growth under iron sufficient (10  $\mu$ M) conditions as a function of boron concentration while the lower four curves represent the growth under iron deficient (50 nM) conditions.
